# Supplementary material
Source: PubMed Central journal article supplement (PMC6946904)
Supplement: NIHMS1541922-supplement-261_2019_2306_MOESM2_ESM.pdf [file NIHMS1541922-supplement-261_2019_2306_MOESM2_ESM.pdf]

Article name: Deep Convolutional Neural Network Applied to The Liver Imaging Reporting and Data System (LI-RADS) version 2014 Category Classification: A Pilot Study

Journal name: Abdominal Radiology

Author names: Blinded for review

Affiliation and e-mail address of the corresponding author: Blinded for review

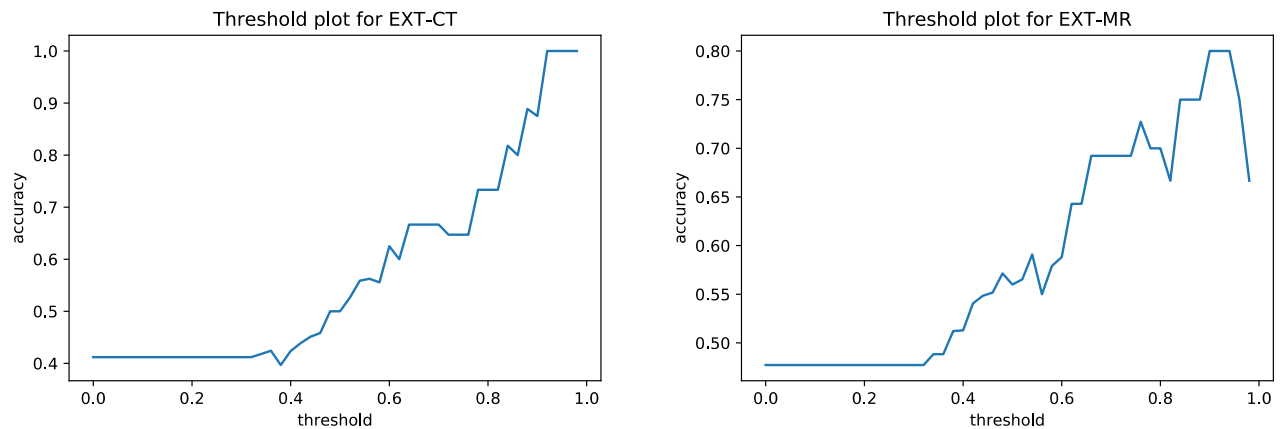

**Fig. E1** Accuracy is plotted as a function of the threshold for the probability of the predicted LI-RADS category for EXT-CT (a) and EXT-MR (b), i.e. the proportion of the correctly classified observations to the observations in which the maximum probability exceeds a certain threshold. Greater accuracy was achieved at increasing thresholds for both EXT-CT and EXT-MR datasets.

Abbreviations: LI-RADS, the Liver Imaging Reporting and Data System
